# Supplementary material
Source: MDPI journal article supplement (https://www.mdpi.com/2072-4292/9/12/1212)
Supplement: s1 [file s1]

**Rancidity Estimation of Perilla Seed Oil by using Near-Infrared Spectroscopy and Multi-variate Analysis Techniques**

**- Supplementary data -**

I added supplementary tables S1 to show the data source of moisture contents of broadleaf litters used in this study.

**Table S1: Raw data of broadleaf litter moisture contents**

**Table S1** Raw data of broadleaf litter moisture contents.

| Sample No. | Moisture content (%) |
| --- | --- |
| 1 | 0.0 |
| 2 | 2.8 |
| 3 | 4.1 |
| 4 | 7.4 |
| 5 | 8.0 |
| 6 | 8.0 |
| 7 | 8.2 |
| 8 | 8.3 |
| 9 | 10.7 |
| 10 | 10.8 |
| 11 | 11.2 |
| 12 | 11.4 |
| 13 | 12.1 |
| 14 | 12.2 |
| 15 | 13.6 |
| 16 | 14.5 |
| 17 | 17.0 |
| 18 | 18.1 |
| 19 | 19.2 |
| 20 | 20.4 |
| 21 | 20.8 |
| 22 | 24.0 |
| 23 | 27.6 |
| 24 | 28.6 |
| 25 | 28.8 |
| 26 | 29.1 |
| 27 | 31.8 |
| 28 | 32.3 |
| 29 | 32.9 |
| 30 | 33.6 |
| 31 | 33.9 |
| 32 | 33.9 |
| 33 | 34.4 |
| 34 | 35.0 |
| 35 | 35.4 |
| 36 | 36.1 |
| 37 | 37.5 |
| 38 | 38.6 |
| 39 | 38.6 |
| 40 | 39.9 |
| 41 | 40.8 |
| 42 | 43.0 |
| 43 | 44.3 |
| 44 | 45.9 |
| 45 | 46.1 |
| 46 | 48.9 |
| 47 | 51.0 |
| 48 | 54.2 |
| 49 | 54.4 |
| 50 | 54.7 |
| 51 | 55.2 |
| 52 | 55.7 |
| 53 | 58.1 |
| 54 | 59.1 |
| 55 | 60.0 |
| 56 | 60.0 |
| 57 | 62.0 |
| 58 | 62.9 |
| 59 | 63.1 |
| 60 | 67.6 |
| 61 | 69.9 |
| 62 | 70.2 |
| 63 | 70.3 |
| 64 | 71.0 |
| 65 | 75.0 |
| 66 | 75.8 |
| 67 | 78.4 |
| 68 | 79.3 |
| 69 | 80.2 |
| 70 | 83.1 |
| 71 | 84.6 |
| 72 | 85.7 |
| 73 | 87.0 |
| 74 | 87.7 |
| 75 | 89.5 |
| 76 | 101.6 |
| 77 | 103.1 |
| 78 | 110.0 |
| 79 | 110.0 |
| 80 | 110.4 |
| 81 | 113.4 |
| 82 | 120.7 |
| 83 | 126.1 |
| 84 | 129.2 |
| 85 | 144.1 |
| 86 | 148.4 |
| 87 | 154.9 |
| 88 | 161.1 |
| 89 | 163.6 |
| 90 | 165.6 |
| 91 | 167.5 |
| 92 | 169.2 |
| 93 | 172.3 |
| 94 | 176.1 |
| 95 | 188.0 |
| 96 | 189.3 |
| 97 | 189.8 |
| 98 | 190.7 |
| 99 | 210.8 |
